# Supplementary material for: Salticidae (Arachnida, Araneae) of Thailand: new species and records of Epeus Peckham & Peckham, 1886 and Ptocasius Simon, 1885
Source: PeerJ. 2020 Jun 22;8:e9352. doi: 10.7717/peerj.9352 (PMC7316081; doi:10.7717/peerj.9352)
Supplement: File S1 — Raw data for Figures 11 and 13. [file peerj-08-9352-s001.xls]

## Sheet: Arkusz1
species	latitude	longitude
Epeus albus	20.8485	86.3373
Epeus chilapatensis	26.5505	89.3797
Epeus edwardsi	7.2753	124.5190
Epeus edwardsi	6.2522	125.0006
Epeus edwardsi	6.5000	125.8500
Epeus hawigalboguttatus	7.2753	125.5190
Epeus hawigalboguttatus	7.9043	123.3194
Epeus hawigalboguttatus	8.0833	123.4833
Epeus indicus	20.8485	86.3373
Epeus indicus	27.9166	85.2500
Epeus alboguttatus	27.5	119.7
Epeus bicuspidatus	18.7155	108.8749
Epeus bicuspidatus	27.8533	108.7644
Epeus bicuspidatus	27.8466	108.7713
Epeus bicuspidatus	27.8305	108.7625
Epeus bicuspidatus	23.7	106.8
Epeus bicuspidatus	24.1	110.1
Epeus daiqini sp. n.	14.4414	101.3697
Epeus exdomus	27.6613	85.2338
Epeus flavobilineatus	-6.9761	109.1446
Epeus furcatus	1.3492	103.7764
Epeus gloriformis	14.5000	100.8667
Epeus glorius	18.9554	105.1424
Epeus glorius	29.8355	106.3608
Epeus glorius	29.8355	106.3608
Epeus glorius	23.5838	114.4338
Epeus guangxi	24.1	110.1
Epeus hawigalboguttatus	8.1030	123.4938
Epeus indicus	26.6910	89.2768
Epeus indicus	26.7028	89.6114
Epeus indicus	28.0817	85.1837
Epeus indicus	20.4890	84.4910
Epeus khaoi	14.4414	101.3697
Epeus lucidus	14.5000	100.8667
Epeus mira	1.7063	114.4556
Epeus pallidus	14.5000	100.8667
Epeus pallidus	14.5000	100.8667
Epeus pallidus sp. n.	14.5000	100.8667
Epeus sumatranus	-0.39	100.3308
Epeus szirakii sp. n.	14.5000	100.8667
Epeus tener	12.6	102.15
Epeus tener	14.5000	100.8667
Epeus tener	-5.133333	119.416667
Epeus tener	1.370	125.071
Epeus tener	-1.406	120.666
Epeus tener	-1.408	120.7066
Epeus trangulopalpis	9.6186	76.3844
Epeus trangulopalpis	10.3577	76.2130
Epeus trangulopalpis	11.68	76.3438
Epeus trangulopalpis	10.3980	76.7747
Epeus trangulopalpis	9.6186	76.3844
Ptocasius badongensis comb. nov.	31.016667	110.4
Ptocasius bhutanica comb. nov.	26.8516	89.3884
Ptocasius bilaguncula comb. nov.	25.05	101.866667
Ptocasius bulbosa comb. nov.	30.5332	114.2856
Ptocasius cambridgei comb. nov.	27.3624	89.9946
Ptocasius falcata comb. nov.	34.353835	119.762516
Ptocasius fulvonitens	5.967778	80.425556
Ptocasius gogonaica comb. nov.	27.4500	90.0500
Ptocasius gratiosus	1.290270	103.851959
Ptocasius helvetorum comb. nov.	27.45	89.67
Ptocasius hubeiensis comb. nov.	30.3405556	110.41305555555556
Ptocasius hybrida comb. nov.	27.4391	89.6723
Ptocasius incognita comb. nov.	27.4862	89.8992
Ptocasius intermedia comb. nov.	26.8516	89.3884
Ptocasius kinhi	21.4558	105.6408
Ptocasius kinhi	25.2833	104.9333
Ptocasius kinhi	25.3856	102.247
Ptocasius linzhiensis	29.636683	94.361048
Ptocasius lushiensis comb. nov.	34.04	111.02
Ptocasius metzneri sp. nov.	14.5000	100.8667
Ptocasius montana comb. nov.	27.3624	89.9946
Ptocasius montiformis	21.9167	101.25
Ptocasius nanyuensis comb. nov.	27.3	112.7
Ptocasius nepalica comb. nov.	29.5822	82.5247
Ptocasius nobilis comb. nov.	27.3624	89.9946
Ptocasius nova comb. nov.	27.5026	90.5072
Ptocasius orientalis comb. nov.	25.4	98.15
Ptocasius paraweyersi	21.3615	101.682
Ptocasius paraweyersi	21.9167	101.25
Ptocasius pilosa comb. nov.	27.4862	89.8992
Ptocasius pseudoflexa comb. nov.	25.99363	98.61704
Ptocasius pulchella comb. nov.	30.0338889	110.625
Ptocasius sakaerat sp. nov.	14.5000	100.8667
Ptocasius senchalensis comb. nov.	26.9938	88.2652
Ptocasius silvatica comb. nov.	26.8516	89.3884
Ptocasius simoni comb. nov.	26.8516	89.3884
Ptocasius songi	30.5	102.6667
Ptocasius stemmleri comb. nov.	26.8516	89.3884
Ptocasius strandi comb. nov.	27.5026	90.5072
Ptocasius strupifer	20.3167	105.6333
Ptocasius strupifer	21.025	105.8412
Ptocasius strupifer	21.4167	104.4667
Ptocasius strupifer	22.1	104.7
Ptocasius strupifer	23.2793	113.4409
Ptocasius strupifer	25.0287	121.4956
Ptocasius strupifer	25.0287	121.4956
Ptocasius strupifer	25.5204	119.0533
Ptocasius strupifer	26.8895	112.6189
Ptocasius strupifer	27.2173	77.4901
Ptocasius strupifer	27.9042	110.007
Ptocasius strupifer	28.6989	112.8022
Ptocasius strupifer	29.1294	110.4783
Ptocasius strupifer	29.1667	120
Ptocasius strupifer	29.7719	119.5874
Ptocasius strupifer	31.9853	107.607
Ptocasius strupifer	35.3806	111.2358
Ptocasius supina comb. nov.	27.4391	89.6723
Ptocasius tenella comb. nov.	26.8516	89.3884
Ptocasius tenzingi comb. nov.	27.8167	86.7167
Ptocasius thakkholaica comb. nov.	28.6008	83.6452
Ptocasius thimphuica comb. nov.	27.4391	89.6723
Ptocasius urbanii comb. nov.	27.45	90.05
Ptocasius variegatus	45	77.9167
Ptocasius versicolor	27.45	90.05
Ptocasius vittatus	18.707	108.8297
Ptocasius vittatus	19.2074	109.7809
Ptocasius wangdica comb. nov.	27.4666667	89.883
Ptocasius weyersi	11.4000	107.4000
Ptocasius wuermli comb. nov.	27.5026	90.5072
Ptocasius wuermli comb. nov.	27.4391	89.6723
Ptocasius wuermli comb. nov.	27.1	89.55
Ptocasius yunnanensis	21.9167	101.25
